# Supplementary material
Source: PubMed Central journal article supplement (PMC9938855)
Supplement: 41467_2023_36546_MOESM3_ESM.pdf [file 41467_2023_36546_MOESM3_ESM.pdf]

## **Description of Additional Supplementary Files**

Title: Supplementary Code

Description: R codes and simulated datasets
